# Supplementary material for: Activity and stability of α-chymotrypsin in biocompatible ionic liquids: enzyme refolding by triethyl ammonium acetate
Source: Royal Society of Chemistry journal article supplement (doi:10.1039/c0cp01291b), 2010-12-13

## Electronic supplementary information for

### Activity and stability of $\alpha$ -chymotrypsin in biocompatible ionic liquids: enzyme refolding by triethyl ammonium acetate

Pankaj Attri<sup>a</sup>, Pannuru Venkatesu<sup>a\*</sup> and Anil Kumar<sup>b</sup>

<sup>a</sup> *Department of Chemistry, University of Delhi, Delhi – 110 007, India*

<sup>b</sup> *Physical Chemistry Division, National Chemical Laboratory, Pune-411 008, India*

**Fig. 2** CD analysis of  $T_m$  values of CT at  $\theta_{288}$  in presence of (a) Buffer, (b) TEAA, (c) TEAP, (d) [Bmim][Cl], (e) [Bmim][BF<sub>4</sub>], (f) TEAPBr.

Page 2-7

**Fig. 6** <sup>1</sup>H NMR data for the refolding of CT in TEAA at 30 °C.

Page 8-10

**(a) Buffer**

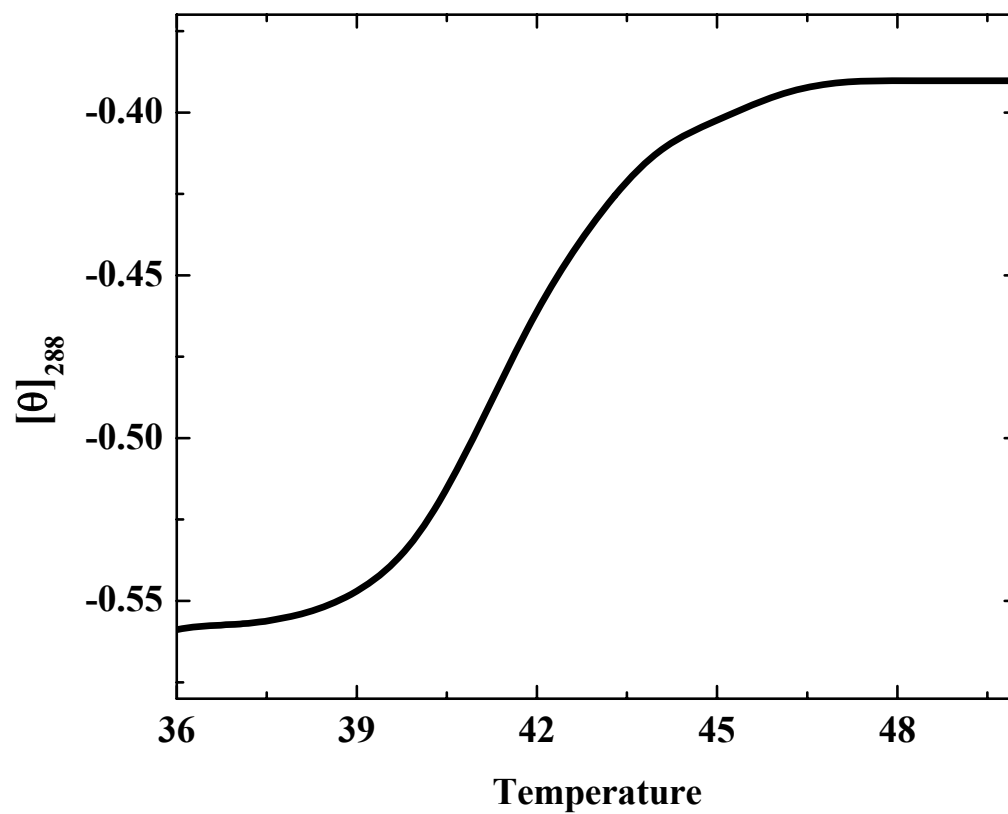

**(b) TEAA**

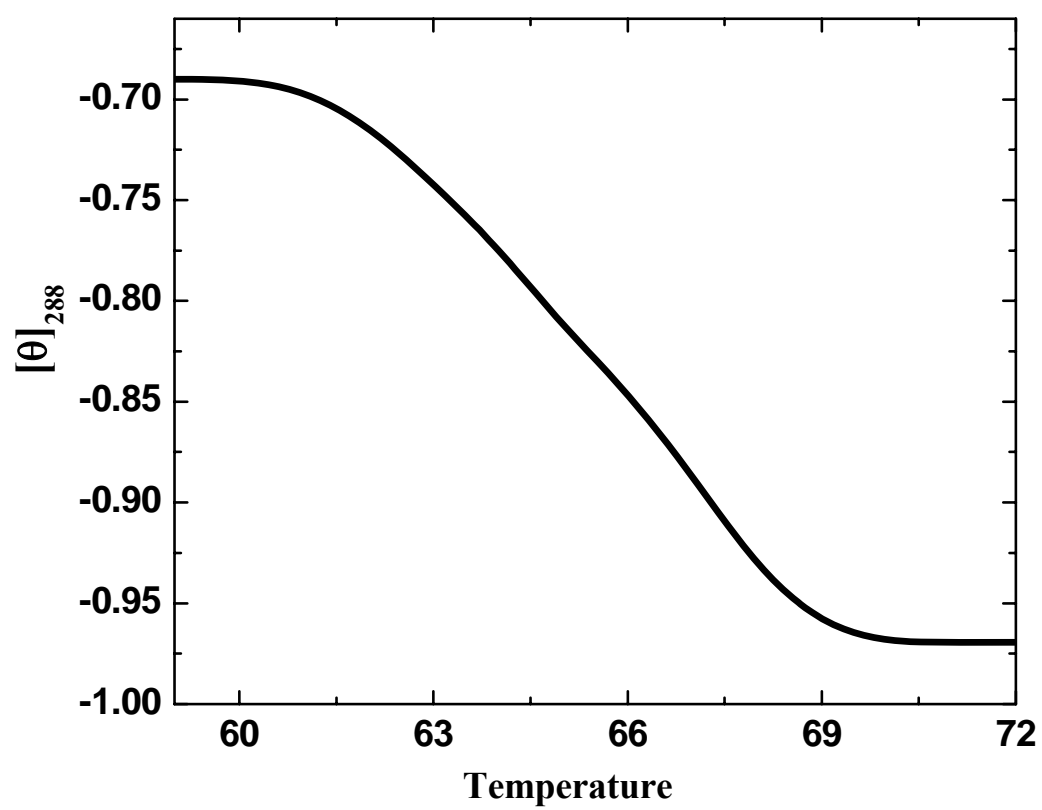

**(c) TEAP**

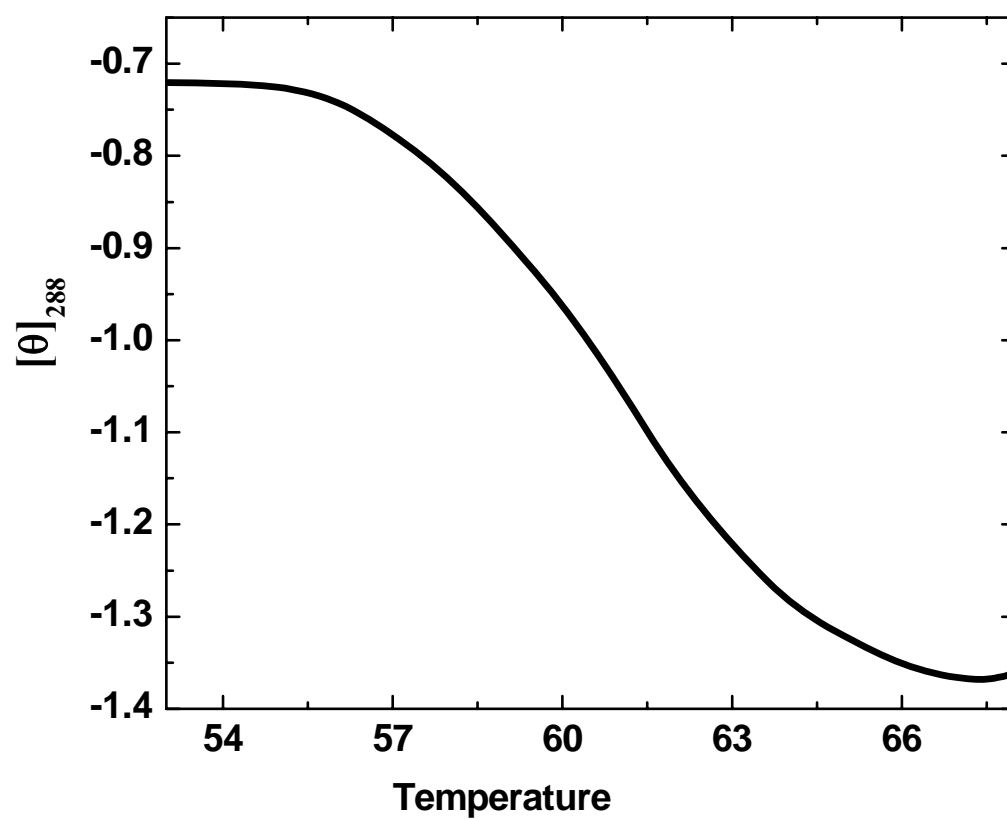

**(d) [Bmim][Cl]**

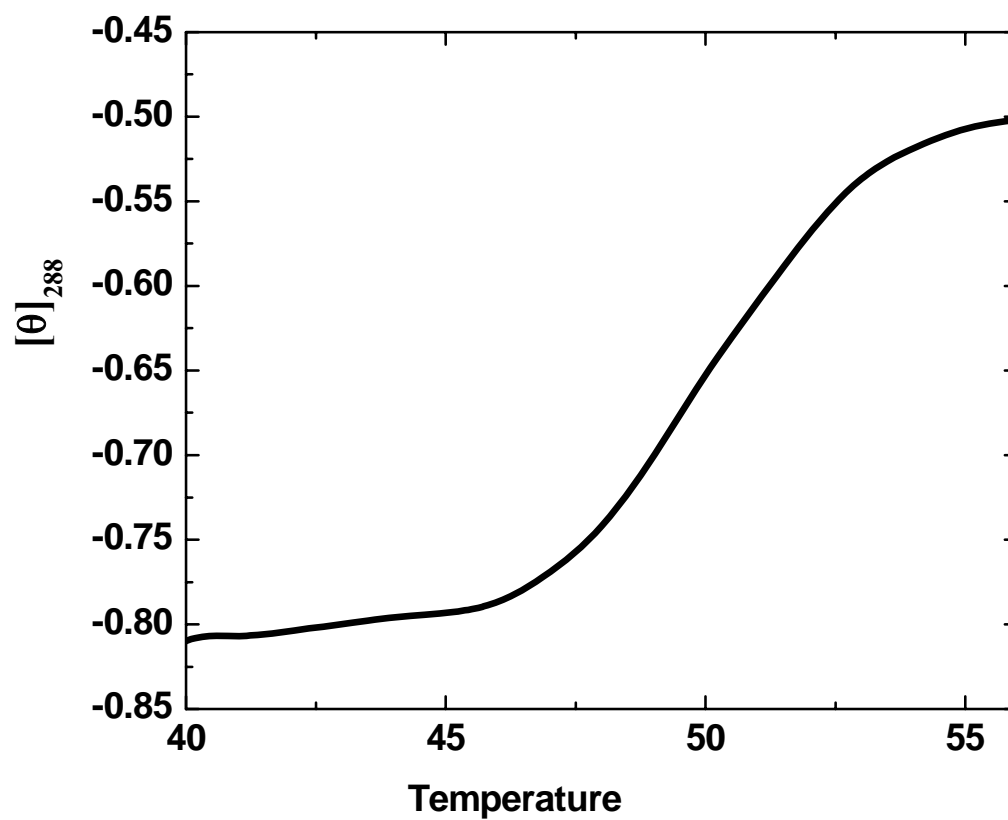

**(e) [Bmim][BF<sub>4</sub>]**

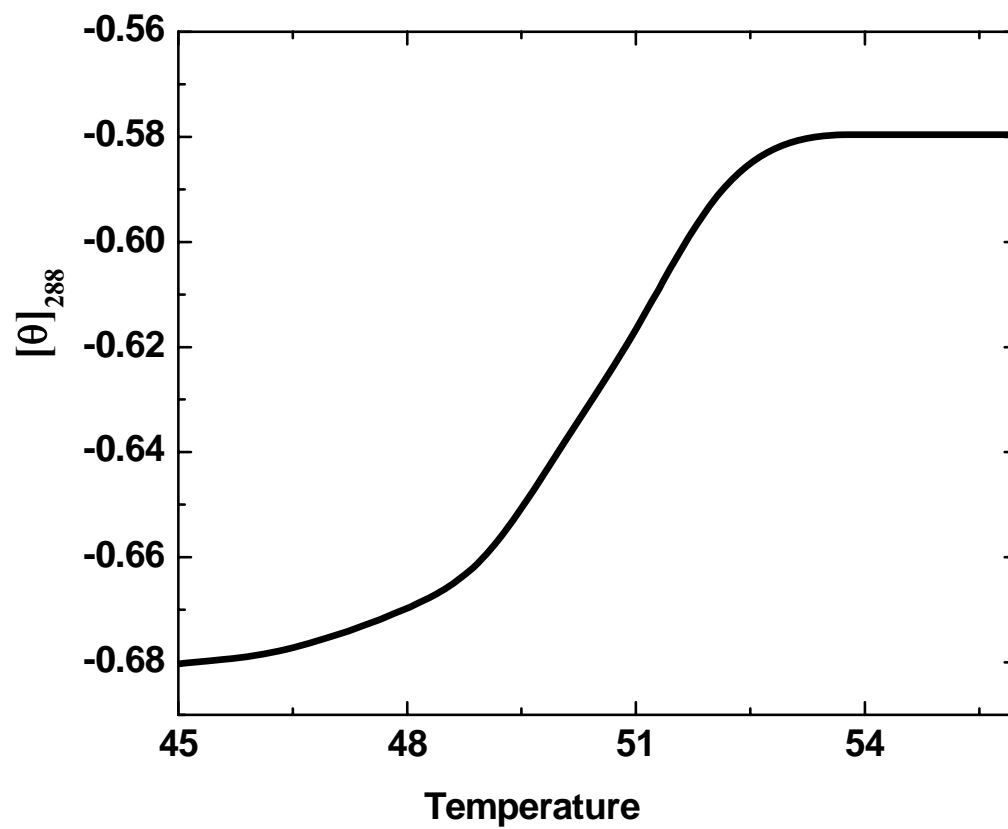

**(f) TEAPBr**

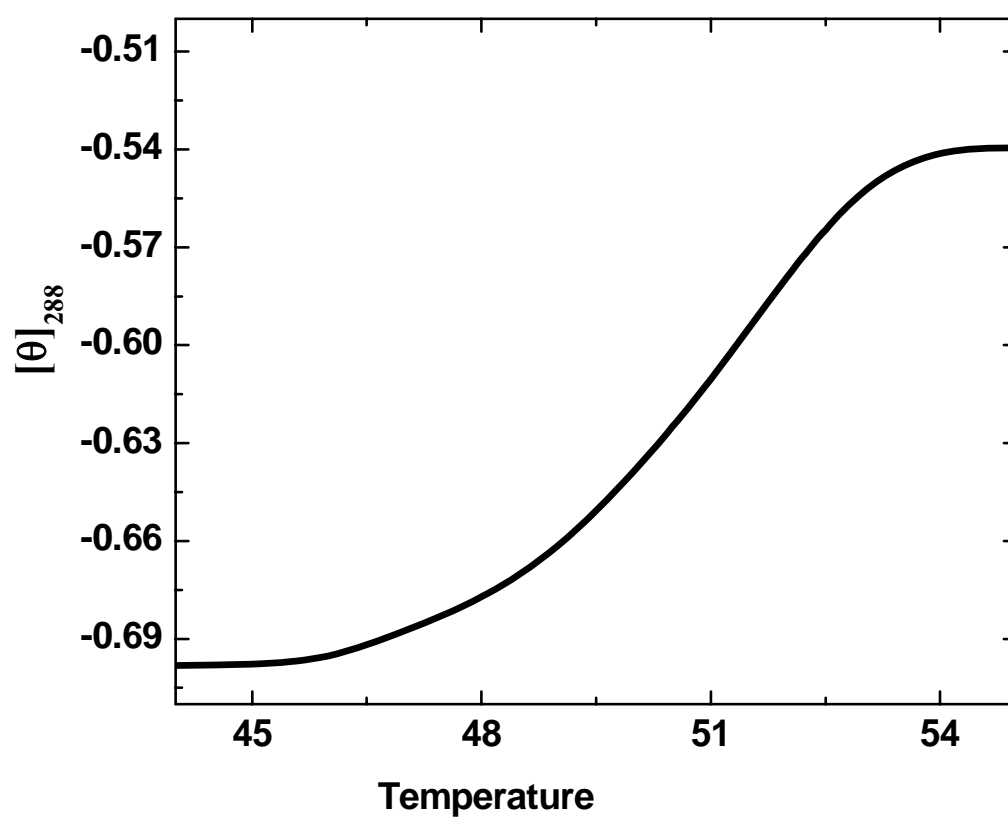

**Fig. 6**  $^1\text{H}$  NMR data for the refolding of CT in TEAA at 30  $^{\circ}\text{C}$ .

**(a)**

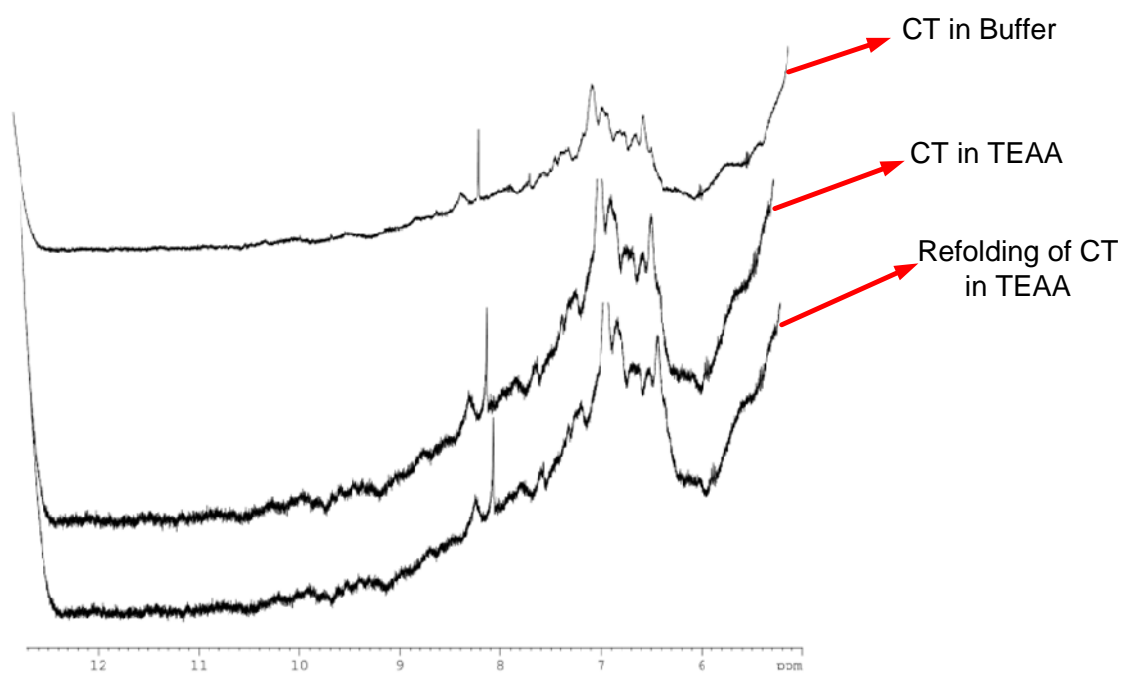



**(b)**

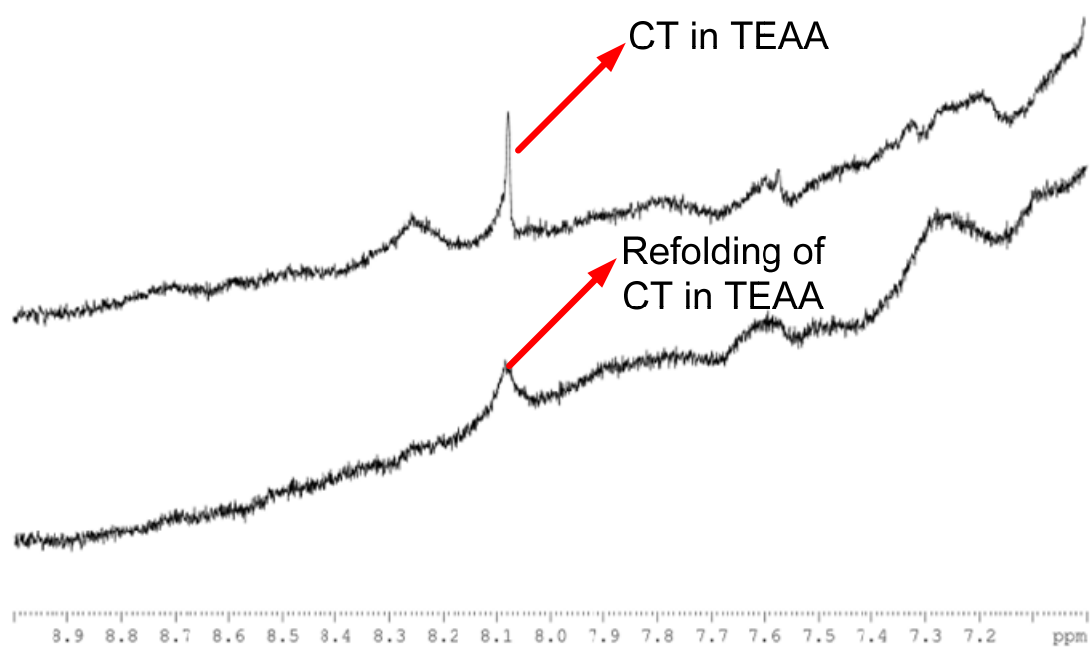

(c)

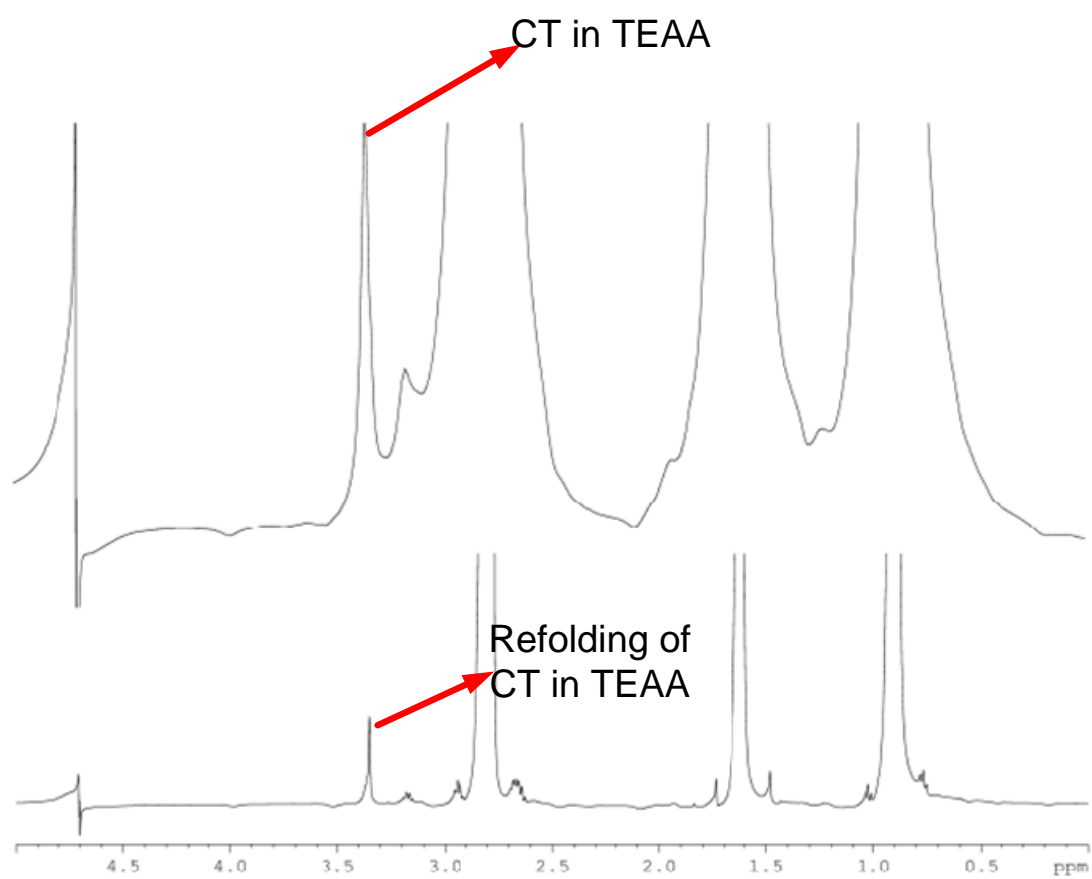

Supplement: c0cp01291b.pdf [file c0cp01291b.pdf]
